# Supplementary material for: Overexpressed MAGP1 Is Associated With a Poor Prognosis and Promotes Cell Migration and Invasion in Gastric Cancer
Source: Front Oncol. 2020 Jan 17;9:1544. doi: 10.3389/fonc.2019.01544 (PMC6978879; doi:10.3389/fonc.2019.01544)
Supplement: Table S3 — 745 genes co-expressed with MAGP1 in GC. [file Table_3.XLSX]

## Sheet: Sheet1
Table S3
Genes co-expressed with MAGP1 in GC(by cBio)	Genes co-expressed with MAGP1 in GC(by coexpedia)	Genes co-expressed with MAGP1 in GC ( by cBio and coexpedia)
CERCAM	COL5A2	CERCAM
MXRA8	COL5A1	MXRA8
CTHRC1	MMP2	CTHRC1
CMTM3	COL1A2	CMTM3
RCN3	COL1A1	RCN3
MEIS3	SPARC	MEIS3
CLEC11A	CDH11	CLEC11A
EFEMP2	VCAN	EFEMP2
SCARF2	HTRA1	SCARF2
SUGCT	BGN	SUGCT
CCDC8	COL3A1	CCDC8
MFRP	COL6A2	MFRP
MAGEL2	GLT8D2	MAGEL2
NREP	FAP	NREP
SERPINH1	THBS2	SERPINH1
BGN	AEBP1	BGN
PCOLCE	EFEMP2	PCOLCE
P4HA3	CTSK	P4HA3
INHBA	RCN3	INHBA
PODNL1	PCOLCE	PODNL1
MFGE8	FBN1	MFGE8
SPON2	DPYSL3	SPON2
RAB3IL1	POSTN	RAB3IL1
COL1A2	ANTXR1	COL1A2
SPARC	LRRC15	SPARC
COL1A1	MXRA8	COL1A1
P3H1	THY1	P3H1
ISLR	MXRA5	ISLR
COL10A1	COL6A3	COL10A1
C1QTNF6	ADAM12	C1QTNF6
ARSI	FSTL1	ARSI
KDELC1	COL6A1	KDELC1
COL5A1	PRRX1	COL5A1
EVA1B	DCN	EVA1B
GPX7	COL12A1	GPX7
THY1	SERPINH1	THY1
PLSCR3	COL10A1	PLSCR3
HOMER3	LUM	HOMER3
AEBP1	CTHRC1	AEBP1
SNAI1	BMP1	SNAI1
COMP	LOXL1	COMP
UBTD1	INHBA	UBTD1
LARP6	ISLR	LARP6
MMP2	COL8A2	MMP2
TWIST1	ANGPTL2	TWIST1
NTM	MYL9	NTM
COPZ2	NID2	COPZ2
PLPP4	SPON1	PLPP4
MMP23B	OLFML2B	MMP23B
CSDC2	SULF1	CSDC2
COL3A1	SERPINF1	COL3A1
CD248	DACT1	CD248
GXYLT2	NREP	GXYLT2
MLLT11	TIMP2	MLLT11
FNDC1	FBLN1	FNDC1
FAP	TNFAIP6	FAP
CPZ	COL16A1	CPZ
SHISA4	ADAMTS2	SHISA4
MATN3	CALD1	MATN3
CNIH3	ZFPM2	CNIH3
SDC2	COL4A1	SDC2
SERPINF1	LOX	SERPINF1
VCAN	CD99	VCAN
FBLN1	PXDN	FBLN1
SPSB1	PPAPDC1A	SPSB1
ITGA11	FN1	ITGA11
SYNDIG1	SDC2	SYNDIG1
MYH10	C1S	MYH10
LUM	GPX8	LUM
CHSY3	EMILIN1	CHSY3
LGALS1	IGFBP7	LGALS1
GPSM1	PPIC	GPSM1
FKBP10	BNC2	FKBP10
ANTXR1	GXYLT2	ANTXR1
FAM19A5	FNDC1	FAM19A5
COL5A2	LOXL2	COL5A2
WDR86	LTBP2	WDR86
H19	FIBIN	H19
SRPX2	PCDH7	SRPX2
ADAMTS16	NUAK1	ADAMTS16
SV2A	COL4A2	SV2A
EFS	ST6GAL2	EFS
THBS2	CMTM3	THBS2
GLIS2	TCF4	GLIS2
IGF2	COPZ2	IGF2
SFRP4	RUNX2	SFRP4
RTL8B	MDK	RTL8B
P3H3	SYNDIG1	P3H3
HHIPL1	ITGBL1	HHIPL1
VASN	CALU	VASN
SULF1	ZNF469	SULF1
HTRA3	ITGAV	HTRA3
IGFBP6	P3H1	IGFBP6
GLT8D2	NBL1	GLT8D2
FBLN2	CRISPLD2	FBLN2
CHST14	RARRES2	CHST14
RARRES2	CKS1B	RARRES2
CTSK	ADAMTS12	CTSK
EVA1A	TPM1	EVA1A
SRRM3	TRAF1	SRRM3
CNPY4	WISP1	CNPY4
TRO	PDGFRB	TRO
MMP17	PALLD	MMP17
FGD1	HYAL2	FGD1
FSTL3	GAS1	FSTL3
TMEM45A	RAE1	TMEM45A
CDR1	APOC2	CDR1
SPOCK1	NPTX2	SPOCK1
FN1	STRA6	FN1
AMIGO2	GPX7	AMIGO2
CDH2	LAMA2	CDH2
MMP11	CTGF	MMP11
UCHL1	COL9A2	UCHL1
FAM171A2	LGALS1	FAM171A2
OLFML1	ALDOC	OLFML1
CPXM1	VKORC1	CPXM1
PALM	CORIN	PALM
OLFML3	FERMT2	OLFML3
EFNB3	TPM2	EFNB3
MRC2	GALNT10	MRC2
LOX	FBN2	LOX
FHL3	TRO	FHL3
TMEM200B	PMEPA1	TMEM200B
SFRP2	TGIF2	SFRP2
CDH11	PTK7	CDH11
PDPN	FBLN5	PDPN
BMP1	PHC2	BMP1
SMIM10	SCAMP1	SMIM10
PLPP7	LPCAT4	PLPP7
CDKN1C	RHOBTB1	CDKN1C
CCDC184	CITED1	CCDC184
CASC15	COL2A1	CASC15
FBXO17	CNRIP1	FBXO17
NTNG2	LDB2	NTNG2
TIMP2	RASGRF2	TIMP2
GFPT2	SHB	GFPT2
TGFB1I1	KDELC1	TGFB1I1
COL8A2	MMP14	COL8A2
CILP2	FBXL7	CILP2
LTBP3	TGFB1I1	LTBP3
ST6GALNAC5	GFPT2	ST6GALNAC5
SHF	PRICKLE1	SHF
COL11A1	PLXND1	COL11A1
LBH	LHFP	LBH
ARHGEF25	PLOD2	ARHGEF25
ETNK2	MRGPRF	ETNK2
EYA4	FBLN2	EYA4
DNM1	ZNF516	DNM1
GPR1	NNMT	GPR1
NOX4	KIAA1462	NOX4
SLC22A17	MEST	SLC22A17
ARMH4	FEZ1	ARMH4
PDGFRL	CAMK2N1	PDGFRL
COL6A2	LAMB1	COL6A2
FLJ16779	TRIB2	FLJ16779
MFAP5	CILP2	MFAP5
FSTL1	TMEFF1	FSTL1
NKAIN4	CD248	NKAIN4
MXRA7	PODN	MXRA7
MMP14	CLEC11A	MMP14
LRRC17	FZD2	LRRC17
PNMA8B	TMEM119	PNMA8B
CD276	MYL6B	CD276
NUAK1	PBX3	NUAK1
SPSB4	TNC	SPSB4
CORIN	RBP1	CORIN
MEX3B	SPON2	MEX3B
MAGEH1	PYCR1	MAGEH1
THPO	TPBG	THPO
BRSK1	DBN1	BRSK1
PDLIM4	SMURF2	PDLIM4
GPC6	PLXDC2	GPC6
SPHK1	TMEM204	SPHK1
CPNE2	SRPX2	CPNE2
SMO	PLOD1	SMO
SNAI2	GPR161	SNAI2
MEDAG	ZNF574	MEDAG
CHRD	EGFL6	CHRD
FKBP7	SLC47A1	FKBP7
SCT	DKK3	SCT
DKK3	PDPN	DKK3
SYDE1	SOX4	SYDE1
CAVIN3	CAPZA2	CAVIN3
LSP1P5	PDGFRA	LSP1P5
MARVELD1	ENO2	MARVELD1
ISM1	C16orf45	ISM1
TWIST2	SERPINE1	TWIST2
LSP1P4	RNF144A	LSP1P4
CST2	FLNA	CST2
LDOC1	MMP11	LDOC1
LMCD1	ATP10D	LMCD1
HSPB2	FKBP14	HSPB2
WTIP	GNB2	WTIP
TENM3	DPYSL4	TENM3
MN1	ZEB1	MN1
PTHLH	FKBP9	PTHLH
MAGED4B	PLXNA1	MAGED4B
FIBIN	BMP4	FIBIN
COL12A1	PDLIM2	COL12A1
PRRX1	OLFML1	PRRX1
RASL10B	PLAU	RASL10B
PTGER3	ZNF521	PTGER3
COL6A3	KDELR3	COL6A3
TIMP3	PMP22	TIMP3
COL8A1	SPOCK1	COL8A1
COX7A1	HCFC1R1	COX7A1
PLOD2	PKM	PLOD2
CCDC74B	LRRC17	CCDC74B
SMARCD3	HIRIP3	SMARCD3
ADAMTS7	MICAL2	ADAMTS7
LOXL3	DPH2	LOXL3
ITGBL1	FXYD6	ITGBL1
DKK2	SERPING1	DKK2
GAS1	GPR137B	GAS1
MSC	ABCB4	MSC
TSPAN9	NOX4	TSPAN9
INAFM1	HMCN1	INAFM1
LINC00922	TMEM45A	LINC00922
KIF3C	SALL2	KIF3C
SALL4	SFRP2	SALL4
NDN	ZNF512B	NDN
B4GALNT1	NINJ2	B4GALNT1
PLA2G5	TUBA1A	PLA2G5
NAT14	LTBP4	NAT14
VEGFC	MFAP5	VEGFC
RPLP0P2	OMD	RPLP0P2
PKIG	FILIP1L	PKIG
VEGFB	IL1R1	VEGFB
IGFBP7	VIM	IGFBP7
LRRC15	MEOX1	LRRC15
DOK5	SLC39A14	DOK5
PTH1R	CCDC80	PTH1R
NCKAP5L	TAGLN	NCKAP5L
DZIP1	PRR16	DZIP1
TMEM121	STEAP1	TMEM121
SSC5D	GJA1	SSC5D
DCN	PTRF	DCN
MCRIP1	GUCY1B3	MCRIP1
NNMT	C1QTNF3	NNMT
OXT	EDNRA	OXT
IGLON5	FRMD6	IGLON5
CPT1C	TMEM185B	CPT1C
TMSB15A	JAM3	TMSB15A
ACKR3	ITGA11	ACKR3
CLEC2L	GUCY1A3	CLEC2L
ANKRD53	COL15A1	ANKRD53
NACAD	AXL	NACAD
NUDT11	MT1E	NUDT11
DPYSL3	TMEM47	DPYSL3
CYS1	SH3KBP1	CYS1
DBN1	PKP1	DBN1
FXYD6	TIMP3	FXYD6
SHISA2	CREB3L1	SHISA2
TMEM158	FSD1	TMEM158
PTK7	SNRPB	PTK7
FAM180A	CNP	FAM180A
TUSC3		TUSC3
LOXL1		LOXL1
HTRA1		HTRA1
GBGT1		GBGT1
DACT1		DACT1
TNFAIP6		TNFAIP6
MYL9		MYL9
TUBA1A		TUBA1A
EMILIN1		EMILIN1
POSTN		POSTN
ZNF853		ZNF853
C1QTNF3		C1QTNF3
FZD2		FZD2
BCAM		BCAM
CAVIN1		CAVIN1
EPDR1		EPDR1
COL18A1		COL18A1
MAP1A		MAP1A
GDF6		GDF6
GGT5		GGT5
A4GALT		A4GALT
FADS2		FADS2
GUCA1A		GUCA1A
HS3ST3A1		HS3ST3A1
LOXL4		LOXL4
TSPAN4		TSPAN4
CHN1		CHN1
PDGFC		PDGFC
PDGFRB		PDGFRB
PGF		PGF
NPTXR		NPTXR
IGF2-AS		IGF2-AS
TMEM119		TMEM119
VKORC1		VKORC1
NOG		NOG
VAT1		VAT1
PNMA8A		PNMA8A
SGCE		SGCE
RAB31		RAB31
ADAM12		ADAM12
SLC39A13		SLC39A13
SFXN3		SFXN3
ROR2		ROR2
SELENOM		SELENOM
TGFB1		TGFB1
ANGPTL2		ANGPTL2
DLX5		DLX5
TEAD2		TEAD2
KCND2		KCND2
EMP3		EMP3
TCEAL7		TCEAL7
SERPING1		SERPING1
PRAF2		PRAF2
ELN		ELN
NRK		NRK
NALCN		NALCN
NR2F1-AS1		NR2F1-AS1
GPX8		GPX8
LRRC32		LRRC32
FGFR1		FGFR1
OBSL1		OBSL1
BEND6		BEND6
PLAT		PLAT
WNT2		WNT2
TPST1		TPST1
TAGLN		TAGLN
HAS2-AS1		HAS2-AS1
CASC10		CASC10
CRISPLD1		CRISPLD1
ACSS3		ACSS3
ARHGAP23		ARHGAP23
FAM229B		FAM229B
NKX3-2		NKX3-2
SCUBE3		SCUBE3
HEY1		HEY1
NXN		NXN
FSCN1		FSCN1
CALD1		CALD1
ANKRD65		ANKRD65
KIAA1755		KIAA1755
ZFHX4-AS1		ZFHX4-AS1
LZTS2		LZTS2
SPACA6		SPACA6
SRPX		SRPX
SYT3		SYT3
C8ORF48		C8ORF48
OLFML2B		OLFML2B
MOV10L1		MOV10L1
RNF144A		RNF144A
ZNF362		ZNF362
CCN1		CCN1
STRA6		STRA6
TIMP1		TIMP1
CST1		CST1
CCDC74A		CCDC74A
SYNC		SYNC
NUMBL		NUMBL
FBN1		FBN1
ARMCX2		ARMCX2
ACTA2		ACTA2
ADGRA2		ADGRA2
LRRN4CL		LRRN4CL
PDLIM3		PDLIM3
LINC01096		LINC01096
PRKD1		PRKD1
LTBP2		LTBP2
APBA2		APBA2
TCF7L1		TCF7L1
CYGB		CYGB
COL16A1		COL16A1
HSD17B14		HSD17B14
ZNF423		ZNF423
CRYGN		CRYGN
ARL4D		ARL4D
PDLIM7		PDLIM7
WNT11		WNT11
ASPN		ASPN
MYL6B		MYL6B
PODN		PODN
TMEM169		TMEM169
SMTNL2		SMTNL2
GCK		GCK
HDGFL3		HDGFL3
ST3GAL4		ST3GAL4
VGLL3		VGLL3
NRSN2		NRSN2
PCDHB5		PCDHB5
RASL12		RASL12
CCDC80		CCDC80
ZNF365		ZNF365
PHLDB1		PHLDB1
NFATC4		NFATC4
RILPL1		RILPL1
GLI1		GLI1
ST6GAL2		ST6GAL2
CALHM2		CALHM2
MMP19		MMP19
FOXS1		FOXS1
JPH3		JPH3
SCHIP1		SCHIP1
GAP43		GAP43
SHANK1		SHANK1
FGF1		FGF1
TUBB6		TUBB6
CLIP3		CLIP3
COL6A1		COL6A1
TCEA2		TCEA2
RAB34		RAB34
APCDD1L		APCDD1L
FRMD6		FRMD6
CEBPB		CEBPB
CYB5R3		CYB5R3
NLGN2		NLGN2
PMP22		PMP22
IGFBP4		IGFBP4
COL24A1		COL24A1
PTMS		PTMS
EVC2		EVC2
NAP1L3		NAP1L3
C11ORF96		C11ORF96
ARL4C		ARL4C
DPYSL4		DPYSL4
MSRB3		MSRB3
SLC4A3		SLC4A3
FGF14		FGF14
HMCN1		HMCN1
ZFPM2		ZFPM2
RBMS1		RBMS1
GPR161		GPR161
STC2		STC2
HECW1		HECW1
TENM4		TENM4
PTPRN		PTPRN
TGFB3		TGFB3
FERMT2		FERMT2
TMEM65		TMEM65
DIO3		DIO3
EVC		EVC
GSDME		GSDME
ELOVL4		ELOVL4
FBXL2		FBXL2
REEP2		REEP2
NUDT10		NUDT10
TMEFF1		TMEFF1
ARMCX1		ARMCX1
LHFPL6		LHFPL6
SALL2		SALL2
LRP12		LRP12
STON1		STON1
ADAMTS2		ADAMTS2
NOTCH3		NOTCH3
RGS4		RGS4
ZNF469		ZNF469
MOXD1		MOXD1
DIRC1		DIRC1
C11ORF95		C11ORF95
FAM133A		FAM133A
PDGFB		PDGFB
FBLN5		FBLN5
SLC24A3		SLC24A3
PHYHIPL		PHYHIPL
HES4		HES4
PRSS23		PRSS23
AXL		AXL
APBB1		APBB1
MEG3		MEG3
FEZ1		FEZ1
ITGB5		ITGB5
CSRP2		CSRP2
SLC45A1		SLC45A1
ANOS1		ANOS1
ZFHX4		ZFHX4
CCIN		CCIN
KANK4		KANK4
FADS1		FADS1
MIR100HG		MIR100HG
PEA15		PEA15
SLC24A2		SLC24A2
TUBB3		TUBB3
CYP27C1		CYP27C1
SEMA4C		SEMA4C
CLSTN2		CLSTN2
TGFB2		TGFB2
PPP1R14A		PPP1R14A
TMEM240		TMEM240
L1CAM		L1CAM
ARHGEF17		ARHGEF17
THBS3		THBS3
TUB		TUB
RAMP2		RAMP2
SHC4		SHC4
CHST12		CHST12
RPS2P32		RPS2P32
SMIM3		SMIM3
ITGA5		ITGA5
MRAS		MRAS
PCDHB4		PCDHB4
BARX1		BARX1
LRRN2		LRRN2
HOPX		HOPX
ECM2		ECM2
PLAC9		PLAC9
ADAMTS6		ADAMTS6
INSYN1		INSYN1
RBP1		RBP1
ZSWIM4		ZSWIM4
SLC26A10		SLC26A10
FADS3		FADS3
EFEMP1		EFEMP1
CTF1		CTF1
PCDHB3		PCDHB3
CERS5		CERS5
DACT3		DACT3
HAS2		HAS2
PRDM6		PRDM6
HSD11B1L		HSD11B1L
C1R		C1R
DUSP14		DUSP14
HLX		HLX
DLG4		DLG4
GREM1		GREM1
ADAMTS12		ADAMTS12
UBE2E2		UBE2E2
HOXD9		HOXD9
GALNT13		GALNT13
FZD1		FZD1
PCYT1B		PCYT1B
PLPPR3		PLPPR3
VSTM4		VSTM4
CALHM5		CALHM5
MAP3K12		MAP3K12
SLC29A4		SLC29A4
SPOCD1		SPOCD1
CNN3		CNN3
MIR503HG		MIR503HG
IGDCC4		IGDCC4
PMEPA1		PMEPA1
QPRT		QPRT
KERA		KERA
PRELP		PRELP
PCDHB2		PCDHB2
TGFBI		TGFBI
EBF4		EBF4
VASH2		VASH2
RADIL		RADIL
LIMS2		LIMS2
CTSF		CTSF
GPR68		GPR68
ST8SIA2		ST8SIA2
NGF		NGF
CCDC102A		CCDC102A
GRID1		GRID1
EDNRA		EDNRA
CLDN11		CLDN11
SH3PXD2B		SH3PXD2B
SORBS3		SORBS3
PIANP		PIANP
IGFBP3		IGFBP3
VIM		VIM
NID2		NID2
CDO1		CDO1
LRCH2		LRCH2
FAM43B		FAM43B
MAMSTR		MAMSTR
FAM89B		FAM89B
NPR3		NPR3
CRISPLD2		CRISPLD2
TNFSF4		TNFSF4
SOX11		SOX11
KCNE4		KCNE4
CRYAB		CRYAB
C1S		C1S
ADAMTS18		ADAMTS18
SAMD11		SAMD11
ID3		ID3
NAALADL1		NAALADL1
MRGPRF		MRGPRF
PLTP		PLTP
ADORA1		ADORA1
FARP1		FARP1
IQCA1		IQCA1
CBX1		CBX1
FBXL7		FBXL7
UBE2QL1		UBE2QL1
GREB1		GREB1
POMC		POMC
LOC441204		LOC441204
SYCE1L		SYCE1L
YPEL4		YPEL4
OMD		OMD
C4ORF48		C4ORF48
TENM3-AS1		TENM3-AS1
LEF1		LEF1
RPSAP52		RPSAP52
FIGNL2		FIGNL2
NKD2		NKD2
C5ORF49		C5ORF49
AOX1		AOX1
AGTRAP		AGTRAP
GRP		GRP
SOX4		SOX4
GPR162		GPR162
ISYNA1		ISYNA1
PARD6G		PARD6G
HIC1		HIC1
INMT		INMT
MFAP4		MFAP4
PCDHGA3		PCDHGA3
RND2		RND2
OLFM2		OLFM2
HSD17B6		HSD17B6
RHOBTB3		RHOBTB3
PKD2		PKD2
ADAMTS14		ADAMTS14
TMEM204		TMEM204
HOXA4		HOXA4
LOXL2		LOXL2
GALNT15		GALNT15
MKX		MKX
TSHZ3		TSHZ3
DSEL		DSEL
CLCNKB		CLCNKB
CHST3		CHST3
BTBD19		BTBD19
ECM1		ECM1
MYL3		MYL3
C1ORF216		C1ORF216
ORAI2		ORAI2
MGP		MGP
RING1		RING1
FAM92A		FAM92A
C5ORF46		C5ORF46
PRICKLE1		PRICKLE1
CST4		CST4
C1QTNF2		C1QTNF2
SORCS2		SORCS2
ZCCHC24		ZCCHC24
FAM20C		FAM20C
GLRB		GLRB
RTN4RL2		RTN4RL2
		MXRA5
		SPON1
		COL4A1
		CD99
		PXDN
		PPAPDC1A
		PPIC
		BNC2
		PCDH7
		COL4A2
		TCF4
		RUNX2
		MDK
		CALU
		ITGAV
		NBL1
		CKS1B
		TPM1
		TRAF1
		WISP1
		PALLD
		HYAL2
		RAE1
		APOC2
		NPTX2
		LAMA2
		CTGF
		COL9A2
		ALDOC
		TPM2
		GALNT10
		FBN2
		TGIF2
		PHC2
		SCAMP1
		LPCAT4
		RHOBTB1
		CITED1
		COL2A1
		CNRIP1
		LDB2
		RASGRF2
		SHB
		PLXND1
		LHFP
		ZNF516
		KIAA1462
		MEST
		CAMK2N1
		LAMB1
		TRIB2
		PBX3
		TNC
		PYCR1
		TPBG
		SMURF2
		PLXDC2
		PLOD1
		ZNF574
		EGFL6
		SLC47A1
		CAPZA2
		PDGFRA
		ENO2
		C16orf45
		SERPINE1
		FLNA
		ATP10D
		FKBP14
		GNB2
		ZEB1
		FKBP9
		PLXNA1
		BMP4
		PDLIM2
		PLAU
		ZNF521
		KDELR3
		HCFC1R1
		PKM
		HIRIP3
		MICAL2
		DPH2
		GPR137B
		ABCB4
		ZNF512B
		NINJ2
		LTBP4
		FILIP1L
		IL1R1
		MEOX1
		SLC39A14
		PRR16
		STEAP1
		GJA1
		PTRF
		GUCY1B3
		TMEM185B
		JAM3
		GUCY1A3
		COL15A1
		MT1E
		TMEM47
		SH3KBP1
		PKP1
		CREB3L1
		FSD1
		SNRPB
		CNP
